# Supplementary material for: Gadolinium oxide nanoplates with high longitudinal relaxivity for magnetic resonance imaging
Source: Royal Society of Chemistry journal article supplement (doi:10.1039/c4nr03505d), 2014-01-01
Supplement: c4nr03505d1.pdf [file c4nr03505d1.pdf]

## Supporting Information

# Gadolinium oxide nanoplates with high longitudinal relaxivity for magnetic resonance imaging

Minjung Cho<sup>a,b</sup>, Richa Sethi<sup>b</sup>, Jeyarama Subramanian, Ananta narayanan<sup>b</sup>, Seung Soo Lee<sup>a</sup>, Denise N. Benoit<sup>a</sup>, Huiguang Zhu<sup>a</sup>, Nasim Taheri<sup>a</sup>, Paolo Decuzzi<sup>b,c</sup>, Vicki L. Colvin<sup>a\*</sup>

<sup>a</sup> Department of Chemistry, Rice University, Houston, TX 77005, USA.

<sup>b</sup> Department of Translational Imaging and Department of Nanomedicine, The Methodist Hospital Research Institute, Houston, TX 77030, USA.

<sup>c</sup> Drug Discovery and Development Department, Istituto Italiano di Tecnologia, Genova 16163, Italy.

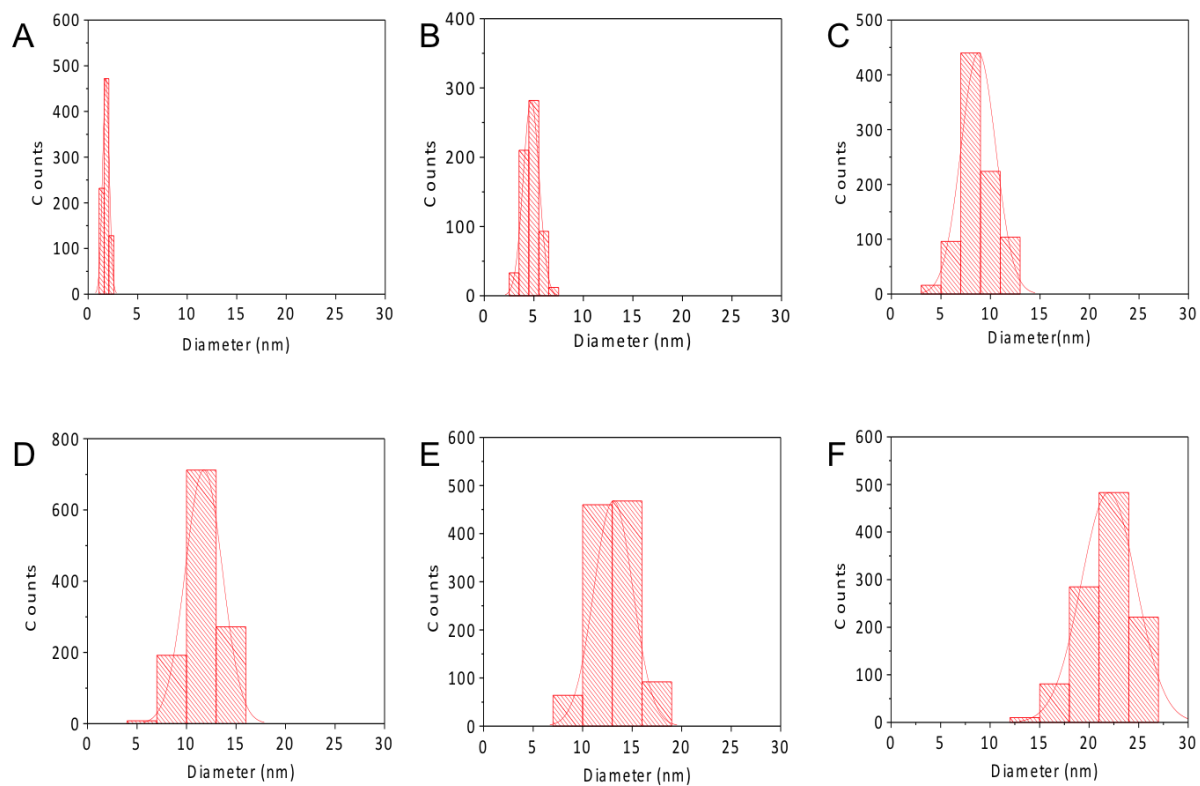

**Fig. S1** The histograms of  $\text{Gd}_2\text{O}_3$  nanoparticles ranging from 2 to 22 nm. The average diameters with standard deviation are (A)  $1.79 \pm 0.23$  nm, (B)  $5.02 \pm 0.45$  nm, (C)  $7.95 \pm 0.82$  nm, (D)  $10.82 \pm 1.75$  nm, (E)  $13.18 \pm 2.09$  nm, and (F)  $21.97 \pm 2.78$  nm, respectively. The averages were calculated with over 1000 individual nanoparticles.

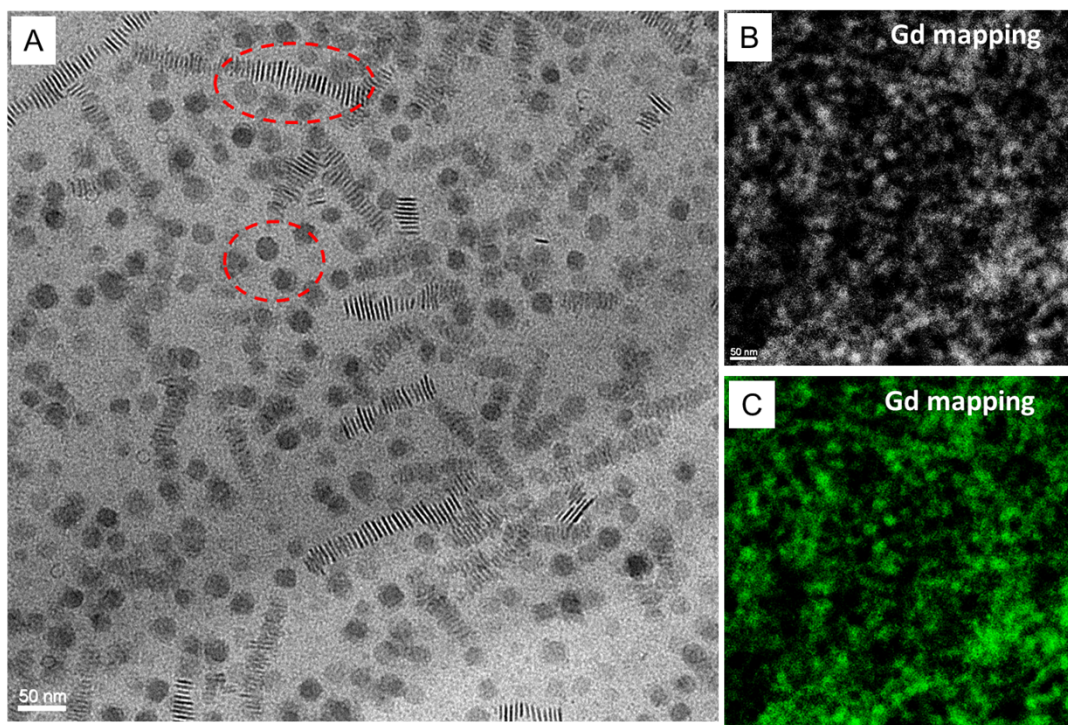

**Fig. S2** The TEM image of 22 nm diameter gadolinium oxide nanoplates; In the TEM images, some ultrathin nanoplates were aligned parallel with face-to-face direction. From Gatan Image Filter (GIF) mapping, these nanoplates have gadolinium (green) in a nanoparticle.

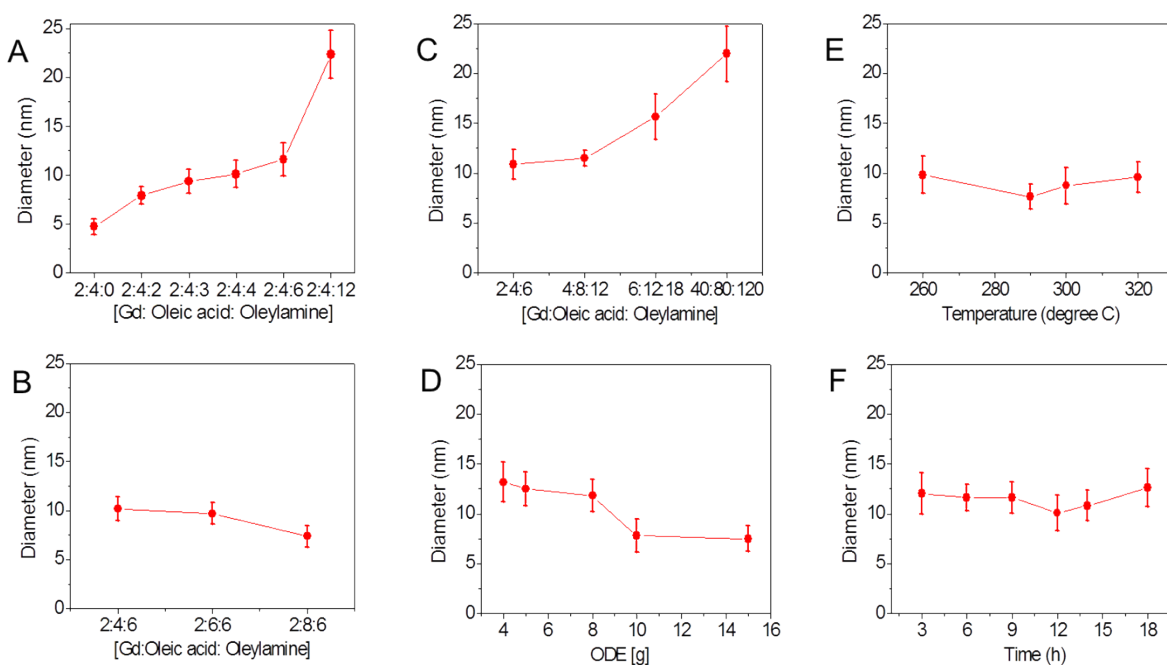

**Fig. S3** The size controllable  $Gd_2O_3$  nanoparticles by changing synthetic parameters (A) oleylamine, (B) oleic acid, (C) concentration of precursors, (D) ODE, (E) temperature, and (F) reflux time; As increasing the amounts of oleylamine (A), the particle sizes were increased from 5 to 22 nm. As increasing the amounts of oleic acid (B), the particle sizes were decreased from 10 to 7 nm. When increasing the concentration of precursors or reducing ODE amounts, the particle sizes were increased due to high monomer concentration. The temperature (E) and (F) did not show any significant size changes.

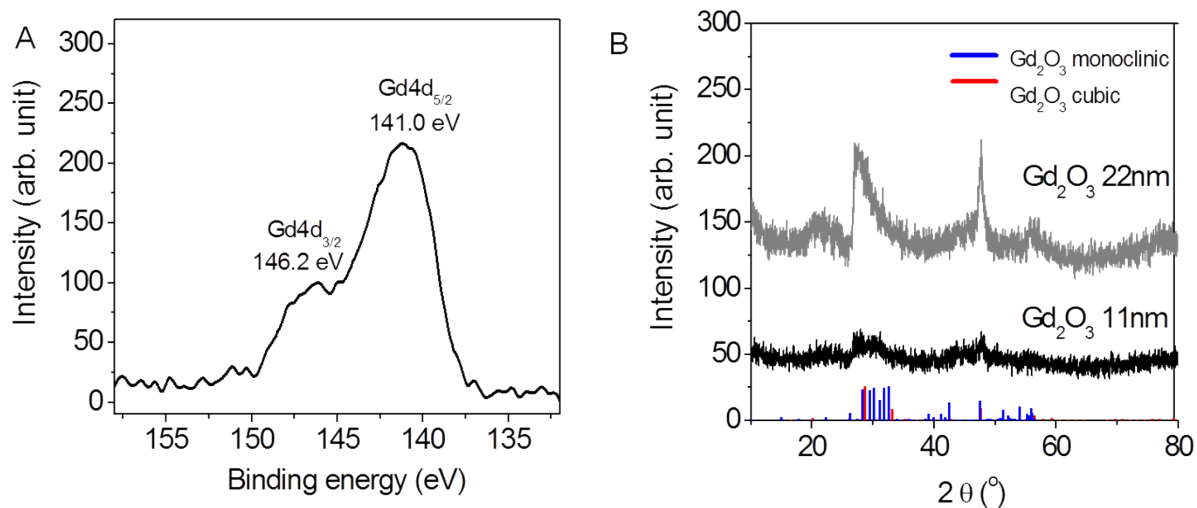

**Fig. S4** XPS and XRD data of  $Gd_2O_3$  nanoparticles (A) XPS data of  $Gd_2O_3$  nanoparticles (11 nm diameter) showing Gd  $4d_{3/2}$  at 146.2 eV and (B) XRD Data of  $Gd_2O_3$  nanoparticles with diameter 11 nm and 22 nm. For the references, JCPDS  $Gd_2O_3$  monoclinic (# 43-1015) and cubic (# 43-1014) were used.

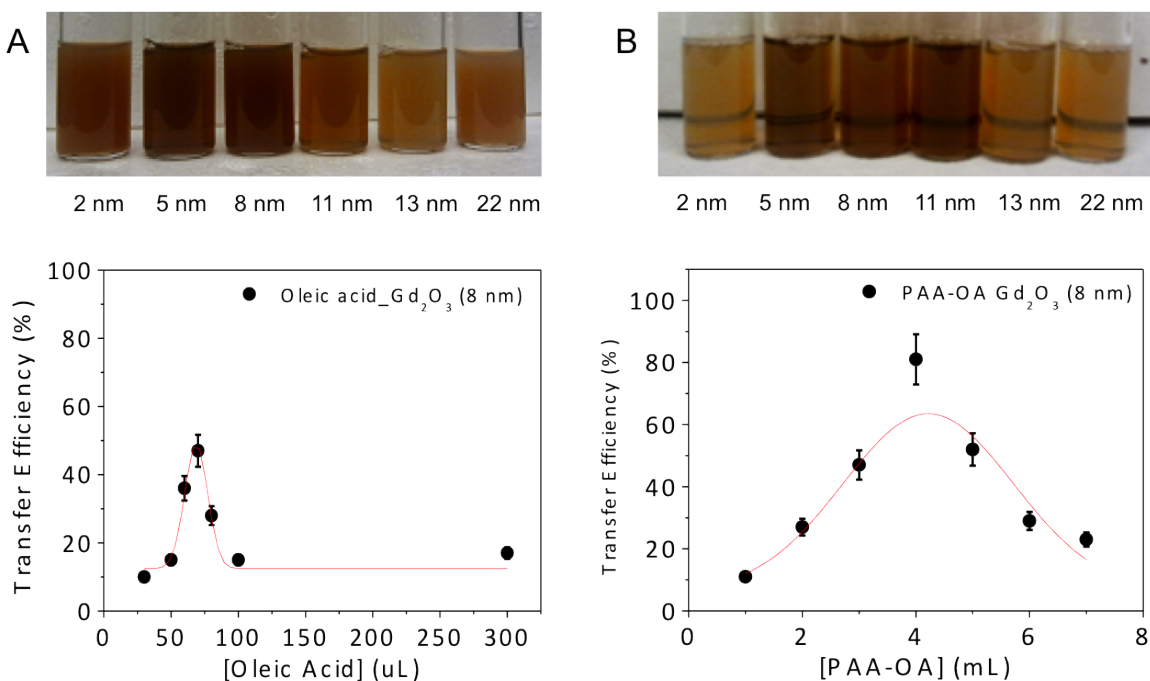

**Fig. S5** The photographs of oleic acid bilayer coated  $\text{Gd}_2\text{O}_3$  nanoparticles with different sizes from 1.8 nm to 22 nm and phase transfer efficiency (%) when using various amounts of oleic acid (30-300  $\mu\text{L}$ ,  $0.95 \times 10^{-4}$  to  $9.5 \times 10^{-4}$  mol) in 1 mL  $\text{Gd}_2\text{O}_3$  nanoparticle/ethyl ether solution (1.5~4 mg/mL) (C) The photographs of PAA-OA coated  $\text{Gd}_2\text{O}_3$  nanoparticles ranging from 1.8 nm to 22 nm diameters and phase transfer efficiency (%) using various amounts of PAA-OA solutions (1-7 mL,  $4 \times 10^{-4}$  to  $26 \times 10^{-4}$  mol) with 1 mL  $\text{Gd}_2\text{O}_3$  nanoparticle/ethyl ether solution (1.5~4 mg/mL). The concentrations of Gd in a particle were analyzed by inductive coupled plasma-optical emission spectroscopy (ICP-OES).

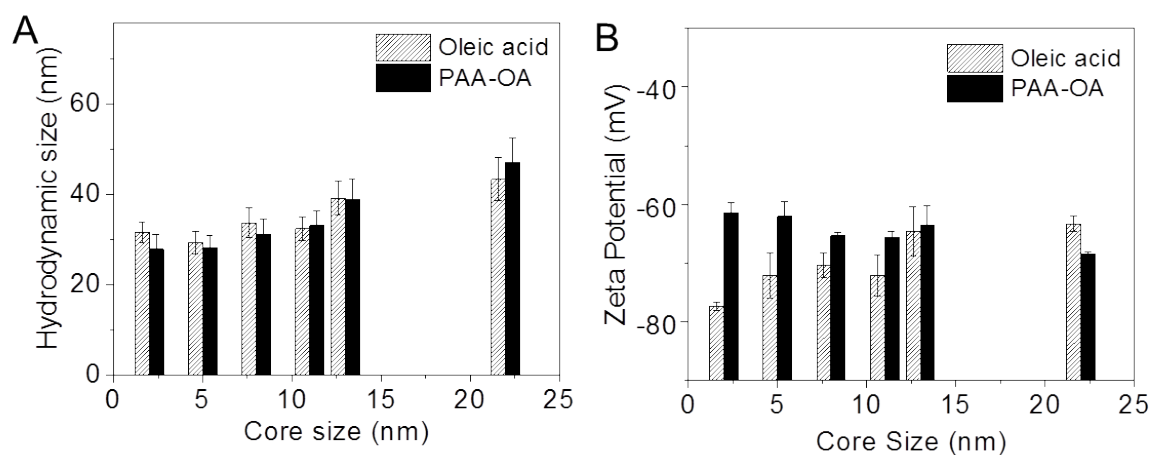

**Fig. S6** (A) The hydrodynamic sizes of oleic acid bilayer and PAA-OA coated  $Gd_2O_3$  nanoparticles with different core diameters (2 to 22 nm) using dynamic light scattering (DLS) analysis; The measurement was repeated 5 times and the average diameters with errors were shown. (B) Zeta Potential (mV) of oleic acid bilayer and PAA-OA coated  $Gd_2O_3$  nanoparticles. Due to carboxylic acid (COOH) and basic solution, the zeta potential was around -60 ~ -80 mV. The measurement was repeated five times for the average and standard deviation.

**Table S1.** The average hydrodynamic sizes (nm) and zeta potentials (mV) of oleic acid bilayer and PAA-OA coated Gd<sub>2</sub>O<sub>3</sub> nanoparticle

|                | Hydrodynamic size (nm) |            | Zeta Potential (mV) |             |
|----------------|------------------------|------------|---------------------|-------------|
| Core Size (nm) | Oleic acid bilayer     | PAA-OA     | Oleic acid bilayer  | PAA-OA      |
| 2              | 31.6 ± 2.3             | 27.8 ± 3.3 | -77.4 ± 0.7         | -61.5 ± 1.7 |
| 5              | 29.3 ± 2.5             | 28.1 ± 2.8 | -72.1 ± 3.9         | -62.0 ± 2.4 |
| 8              | 33.7 ± 3.2             | 31.2 ± 3.2 | -70.4 ± 2.2         | -65.3 ± 0.5 |
| 11             | 32.4 ± 2.6             | 33.0 ± 3.4 | -72.2 ± 3.5         | -65.6 ± 1.0 |
| 13             | 39.1 ± 3.7             | 38.9 ± 4.5 | -64.7 ± 4.2         | -63.6 ± 3.4 |
| 22             | 43.4 ± 4.8             | 47.1 ± 5.4 | -63.3 ± 1.3         | -68.5 ± 0.5 |



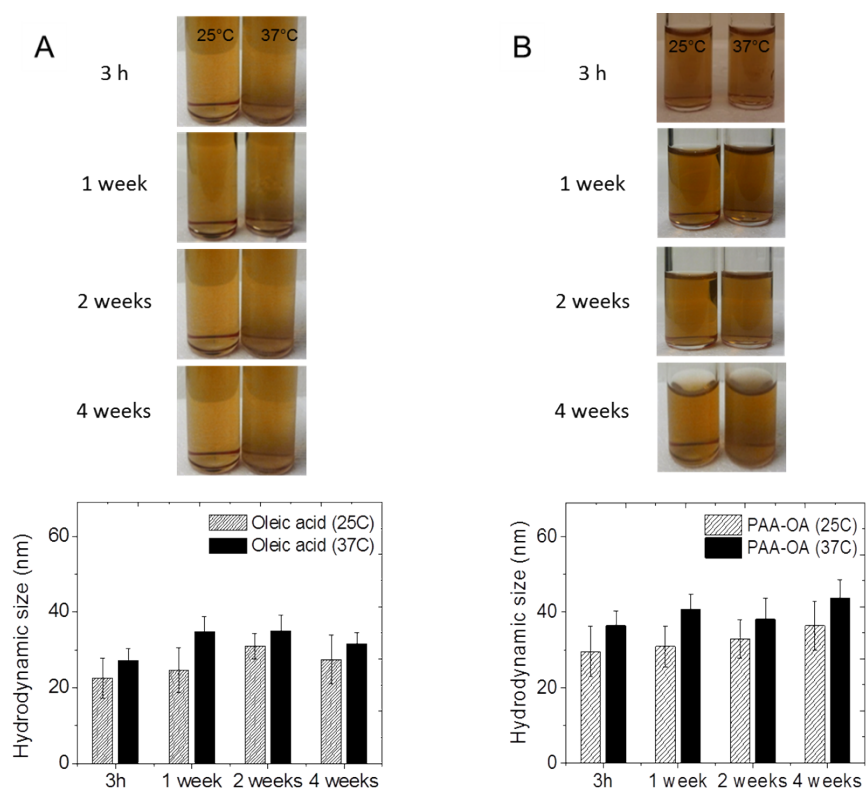

**Fig. S7** The stability test of (A) oleic acid bilayer and (B) PAA-OA coated  $\text{Gd}_2\text{O}_3$  nanoparticles at room temperature (25 °C) and body temperature (37 °C) from 3 h to 4 weeks. The stability data were based on the photographs and the changes of hydrodynamic size (nm) for long-term duration.

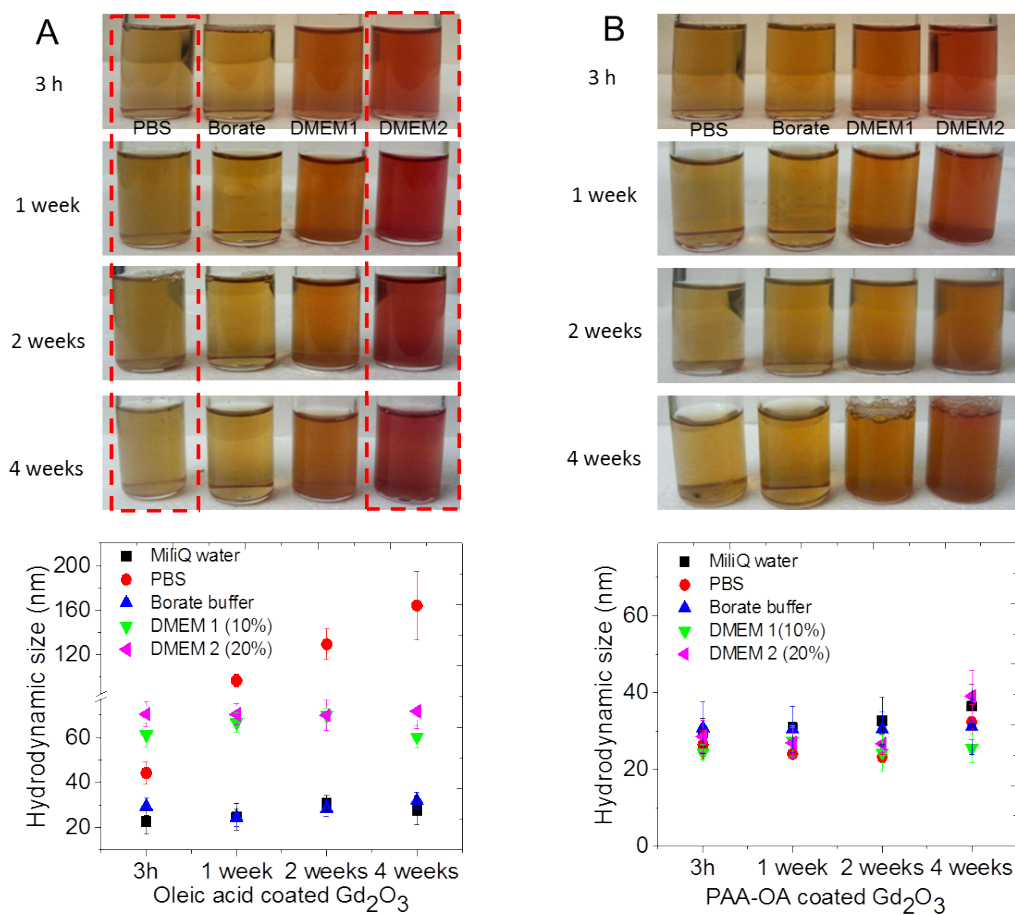

**Fig. S8** The stability test of (A) oleic acid bilayer and (B) PAA-OA coated  $Gd_2O_3$  nanoparticles at different buffer conditions including phosphate buffer saline (PBS), borate buffer (BB), DMEM 1 (10 %), and DMEM2 (20 %) cell media solution. The stability data were based on the visible change (photographs) and the changes of hydrodynamic sizes (nm) for long-term duration (up to 4 weeks).

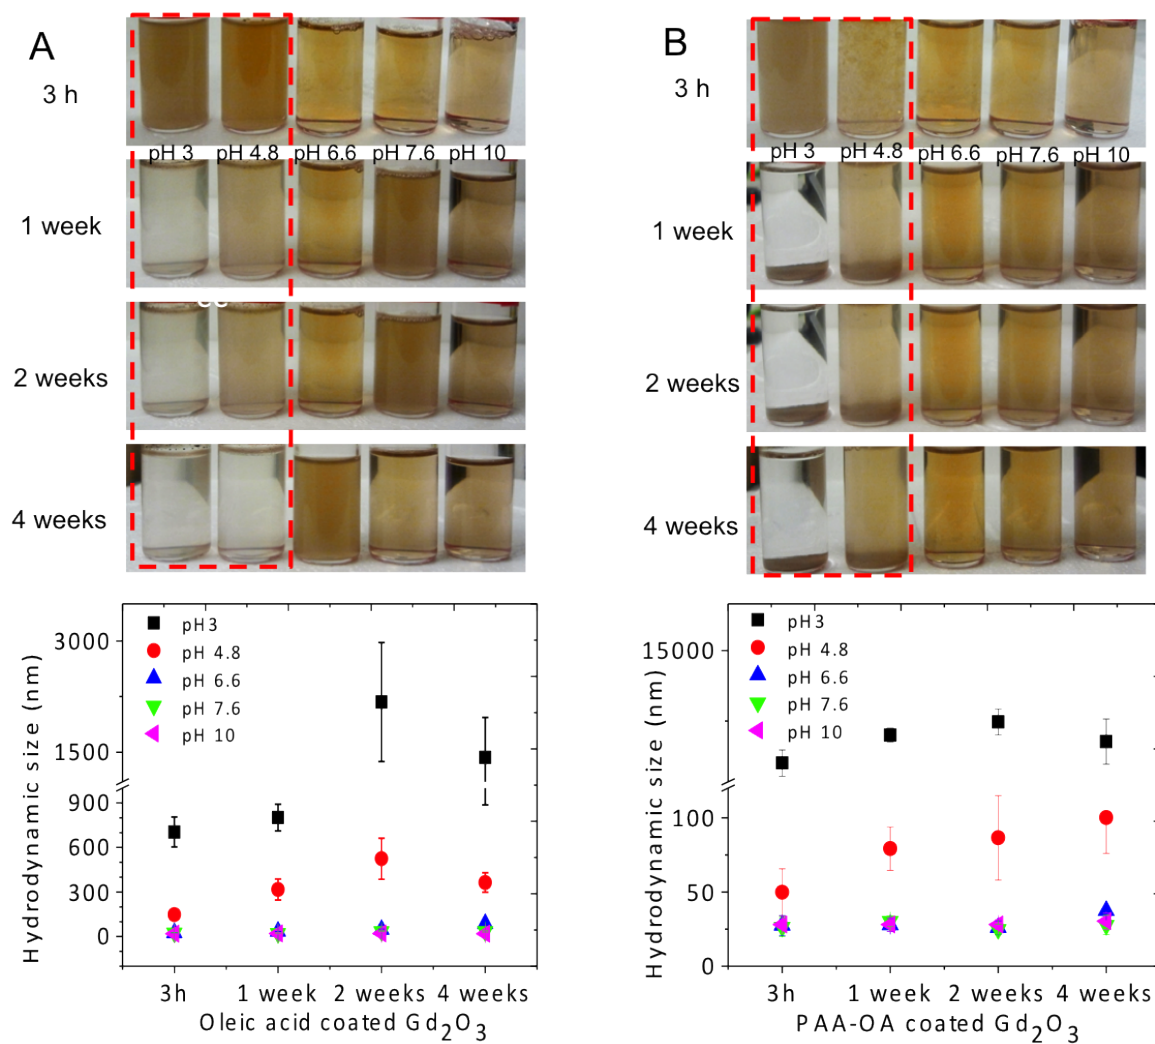

**Fig. S9** The stability test of (A) oleic acid bilayer and (B) PAA-OA coated  $Gd_2O_3$  nanoparticles at different pH conditions at 3, 4.8, 6.6, 7.6, and 10. The stabilities were determined from the photographs and changes of hydrodynamic sizes (nm) for long-term duration (up to 4 weeks).

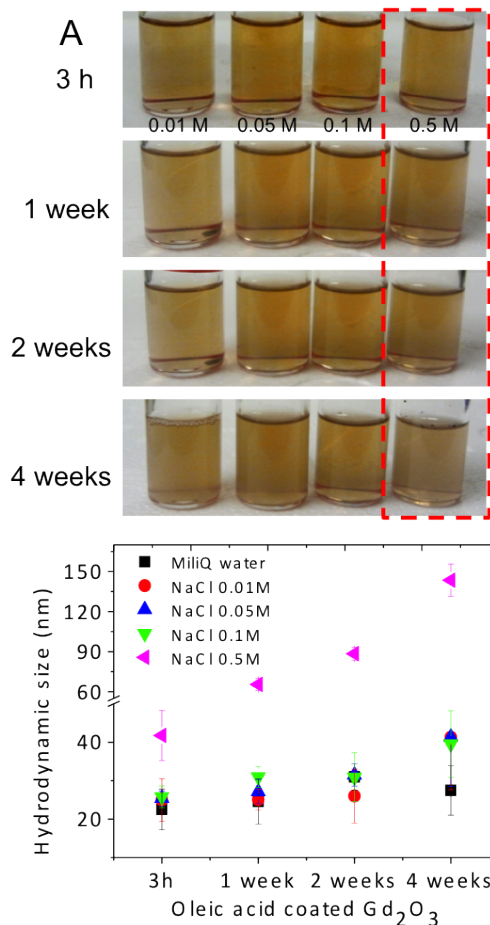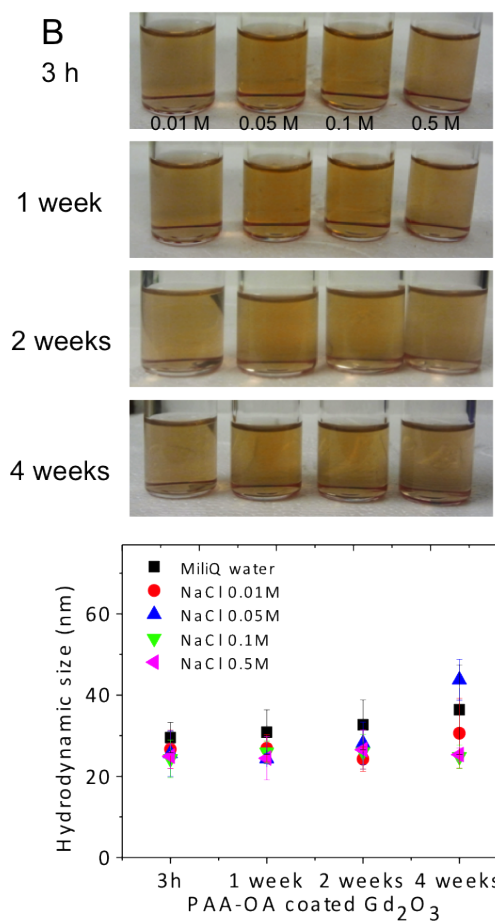

**Fig. S10** The stability test of (A) oleic acid bilayer and (B) PAA-OA coated  $Gd_2O_3$  nanoparticles at different ionic strengths (0.01 M NaCl to 0.5M NaCl). The stability data were based on the visible photographs and changes of hydrodynamic sizes (nm) for long-term duration (up to 4 weeks).

**Table S2.** The stabilities on the hydrodynamic sizes of gadolinium oxide suspensions under various conditions.

|            | The change of hydrodynamic size (√ : stable, □: little stable, ✖ : non-stable) |      |         |        |       |       |    |     |     |     |    |          |      |     |     |
|------------|--------------------------------------------------------------------------------|------|---------|--------|-------|-------|----|-----|-----|-----|----|----------|------|-----|-----|
|            | Temperature                                                                    |      | Buffers |        |       |       | pH |     |     |     |    | NaCl (M) |      |     |     |
|            | 25°C                                                                           | 37°C | PBS     | Borate | DMEM1 | DMEM2 | 3  | 4.8 | 6.6 | 7.6 | 10 | 0.01     | 0.05 | 0.1 | 0.5 |
| Oleic acid | √                                                                              | √    | ✖       | √      | □     | □     | ✖  | □   | √   | √   | √  | √        | √    | √   | ✖   |
| PAA-OA     | √                                                                              | √    | √       | √      | √     | √     | ✖  | □   | √   | √   | √  | √        | √    | √   | √   |

**Table S3.** The stabilities on  $r_1$  relaxivities of gadolinium oxide suspensions under various conditions.

|            | The change of $r_1$ relaxivity ( $\checkmark$ : stable, $\square$ : little stable, $\otimes$ : non-stable) |              |           |              |              |              |           |           |              |              |              |              |              |              |              |
|------------|------------------------------------------------------------------------------------------------------------|--------------|-----------|--------------|--------------|--------------|-----------|-----------|--------------|--------------|--------------|--------------|--------------|--------------|--------------|
|            | Temperature                                                                                                |              | Buffers   |              |              |              | pH        |           |              |              |              | NaCl (M)     |              |              |              |
|            | 25°C                                                                                                       | 37°C         | PBS       | Borate       | DMEM1        | DMEM2        | 3         | 4.8       | 6.6          | 7.6          | 10           | 0.01         | 0.05         | 0.1          | 0.5          |
| Oleic acid | $\checkmark$                                                                                               | $\checkmark$ | $\otimes$ | $\checkmark$ | $\checkmark$ | $\checkmark$ | $\otimes$ | $\square$ | $\checkmark$ |
| PAA-OA     | $\checkmark$                                                                                               | $\checkmark$ | $\otimes$ | $\checkmark$ | $\square$    | $\square$    | $\otimes$ | $\square$ | $\checkmark$ |
